# Supplementary material for: Synthesis, Computational, and Anticancer In Vitro Investigations of Aminobenzylnaphthols Derived from 2-Naphtol, Benzaldehydes, and α-Aminoacids via the Betti Reaction
Source: MDPI journal article supplement (doi:10.3390/molecules28207230), 2023-10-23
Supplement: s1 [file s1]

## Supplementary Information

### **Synthesis, Computational, and Anticancer In Vitro Investigations of Aminobenzylnaphthols Derived from 2-Naphthol, Benzaldehydes, and $\alpha$ -Aminoacids via the Betti Reaction**

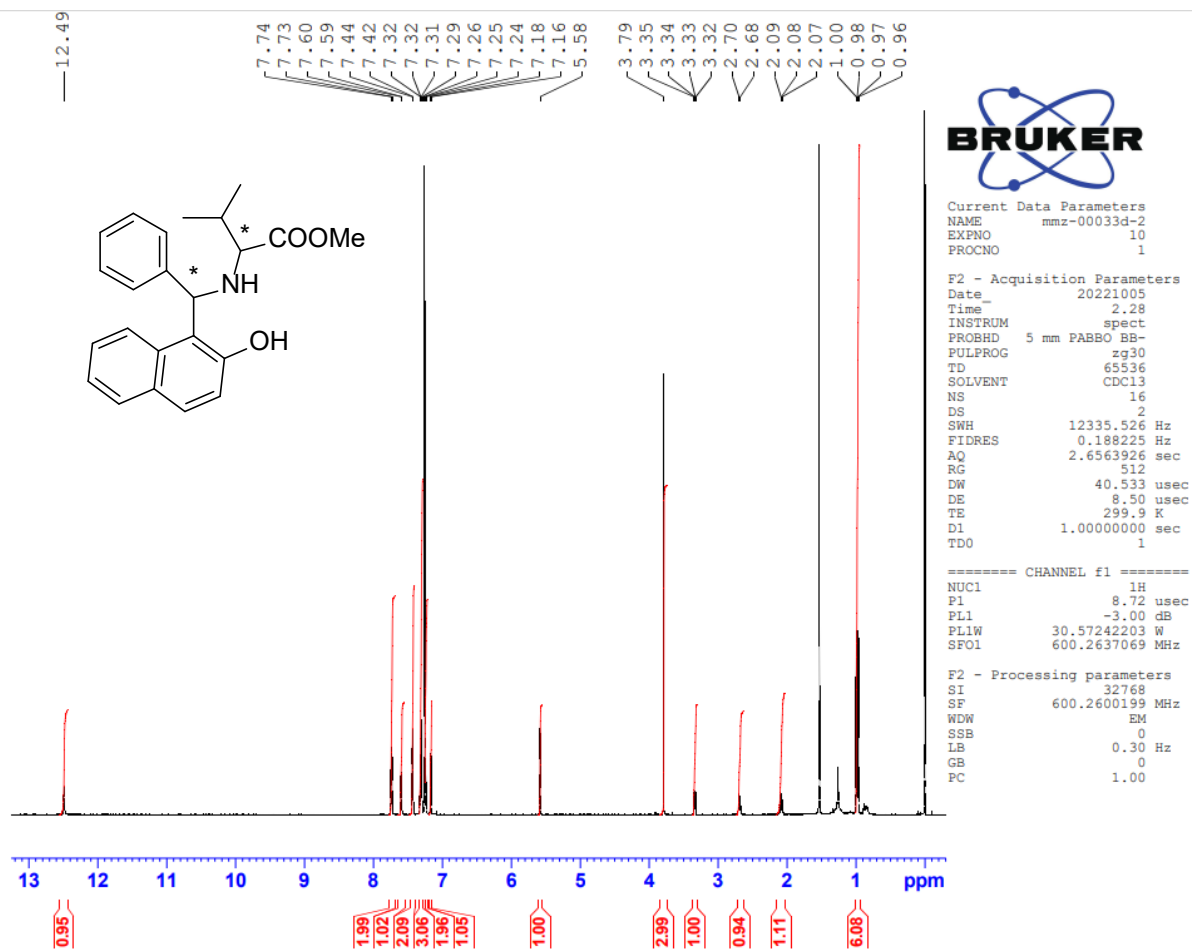

**Figure S1.** <sup>1</sup>H NMR spectra of (S,S) and (R,R)-methyl ((2-hydroxynaphthalen-1-yl)(phenyl)methyl)-D-valinate (MMZ-33D).

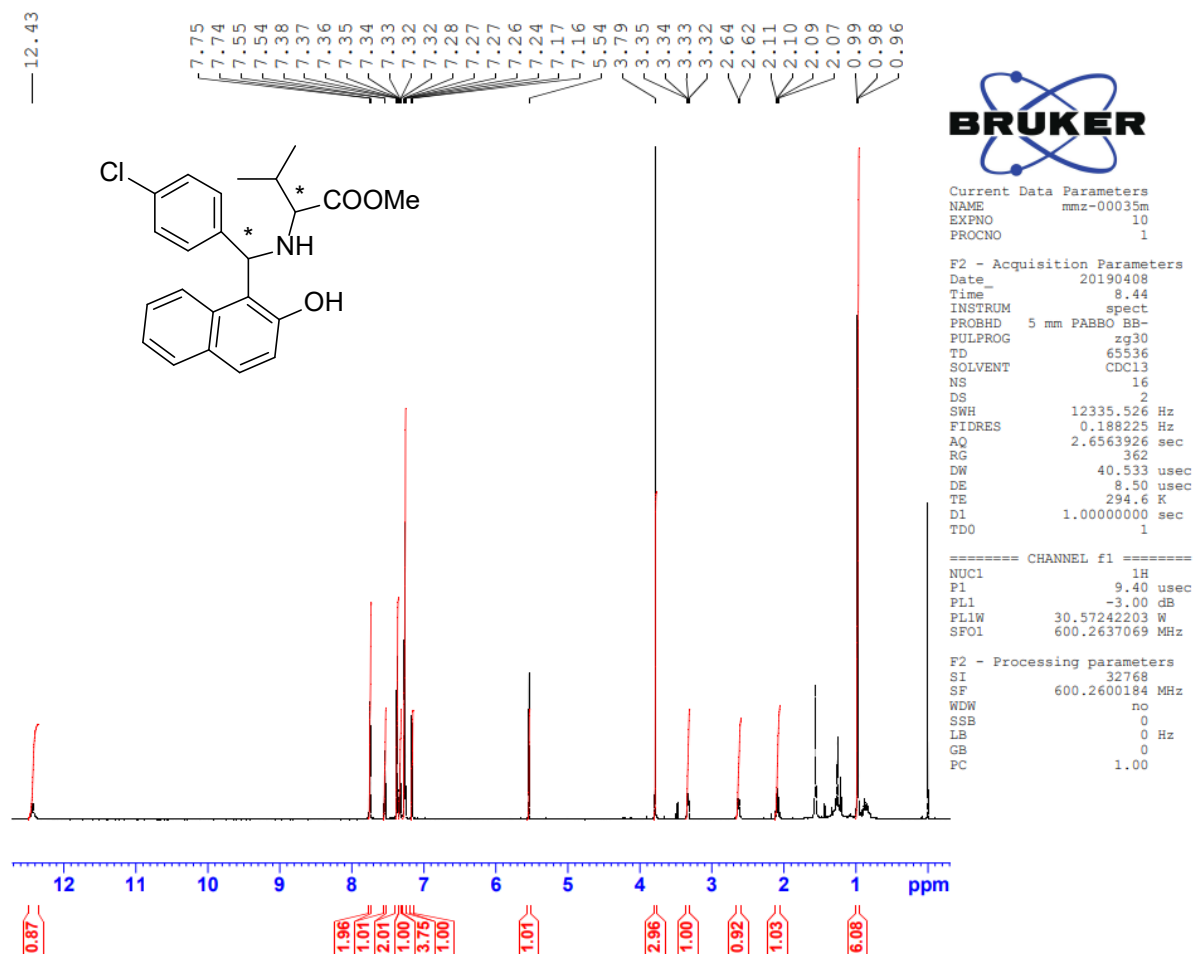

**Figure S2.**  $^1\text{H}$  NMR spectra of (*S,S*) and (*R,R*)-methyl ((4-chlorophenyl)(2-hydroxynaphthalen-1-yl)methyl)-D-valinate (**MMZ-39AA**).

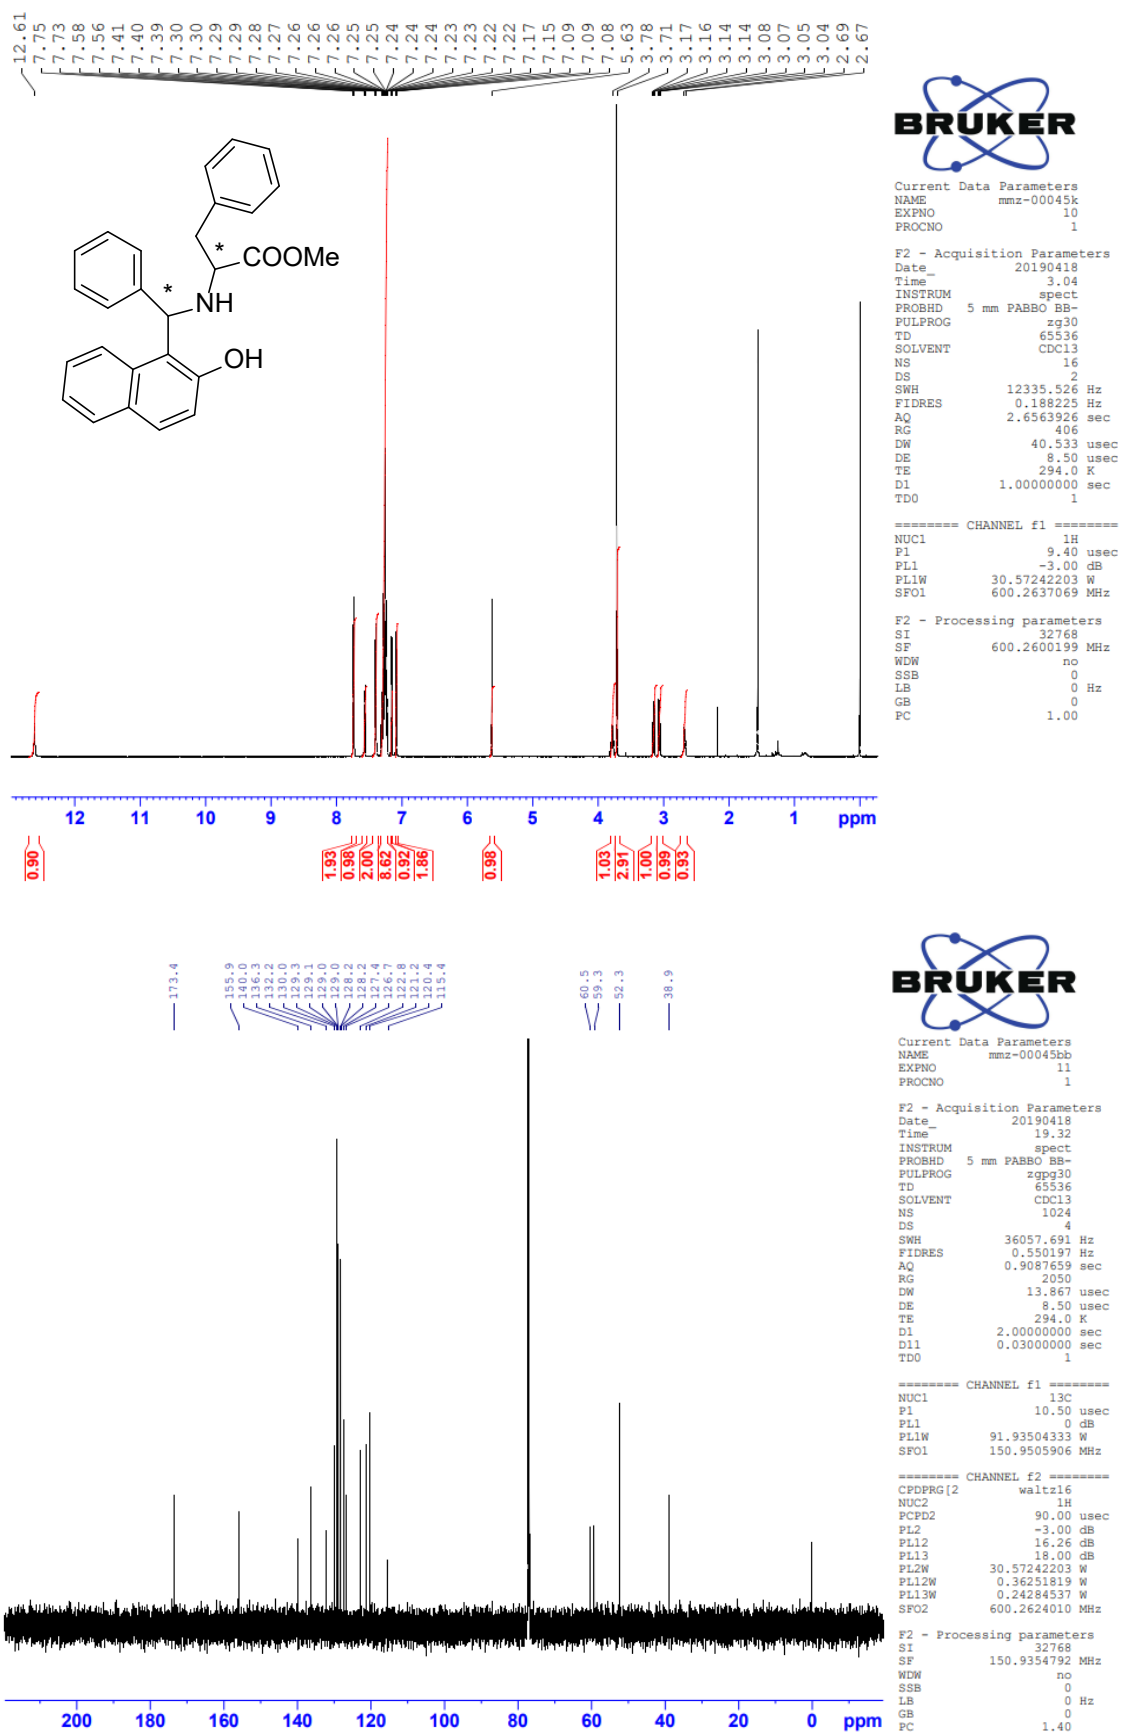

**Figure S3.**  $^1\text{H}$  and  $^{13}\text{C}$  NMR spectra of (*S,S*) and (*R,R*)-methyl ((2-hydroxynaphthalen-1-yl)(phenyl)methyl)-L-phenylalaninate (MMZ-45AA).

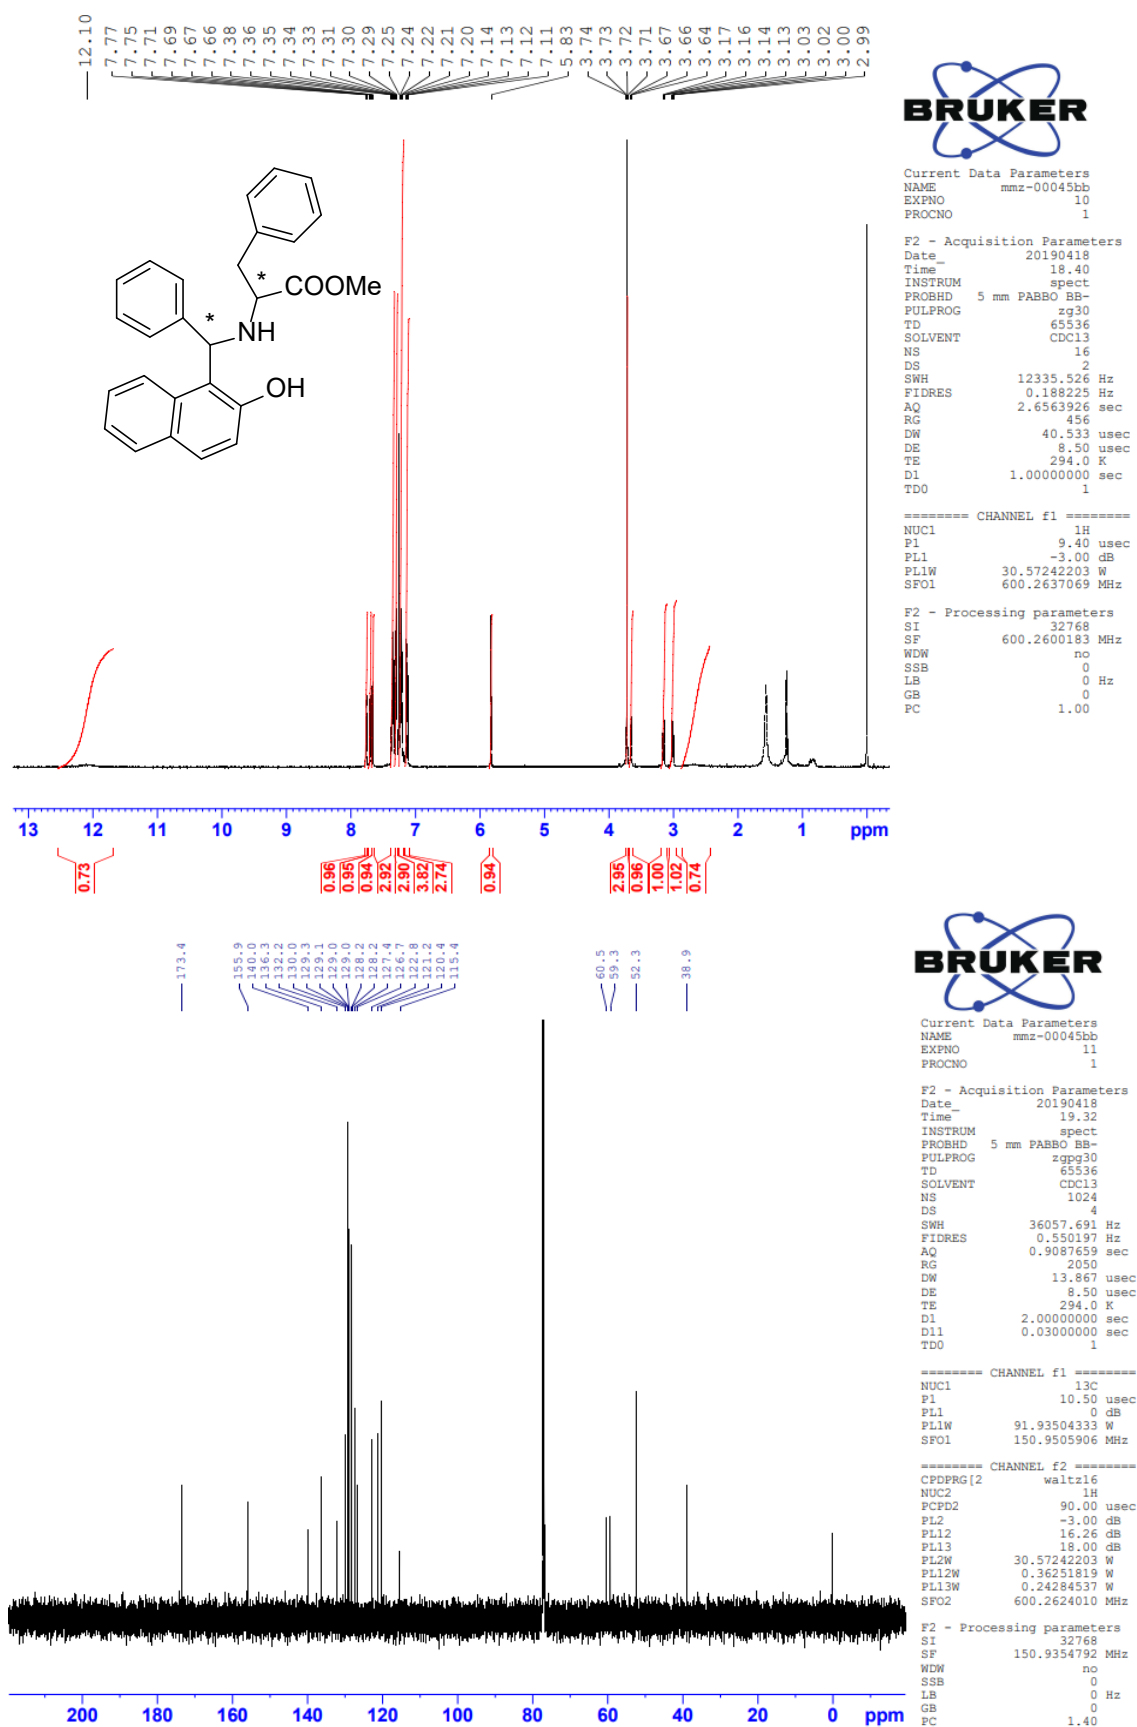

**Figure S4.** <sup>1</sup>H and <sup>13</sup>C NMR spectra of (*S,R*) and (*R,S*)-methyl ((2-hydroxynaphthalen-1-yl)(phenyl)methyl)-L-phenylalaninate (MMZ-45B).

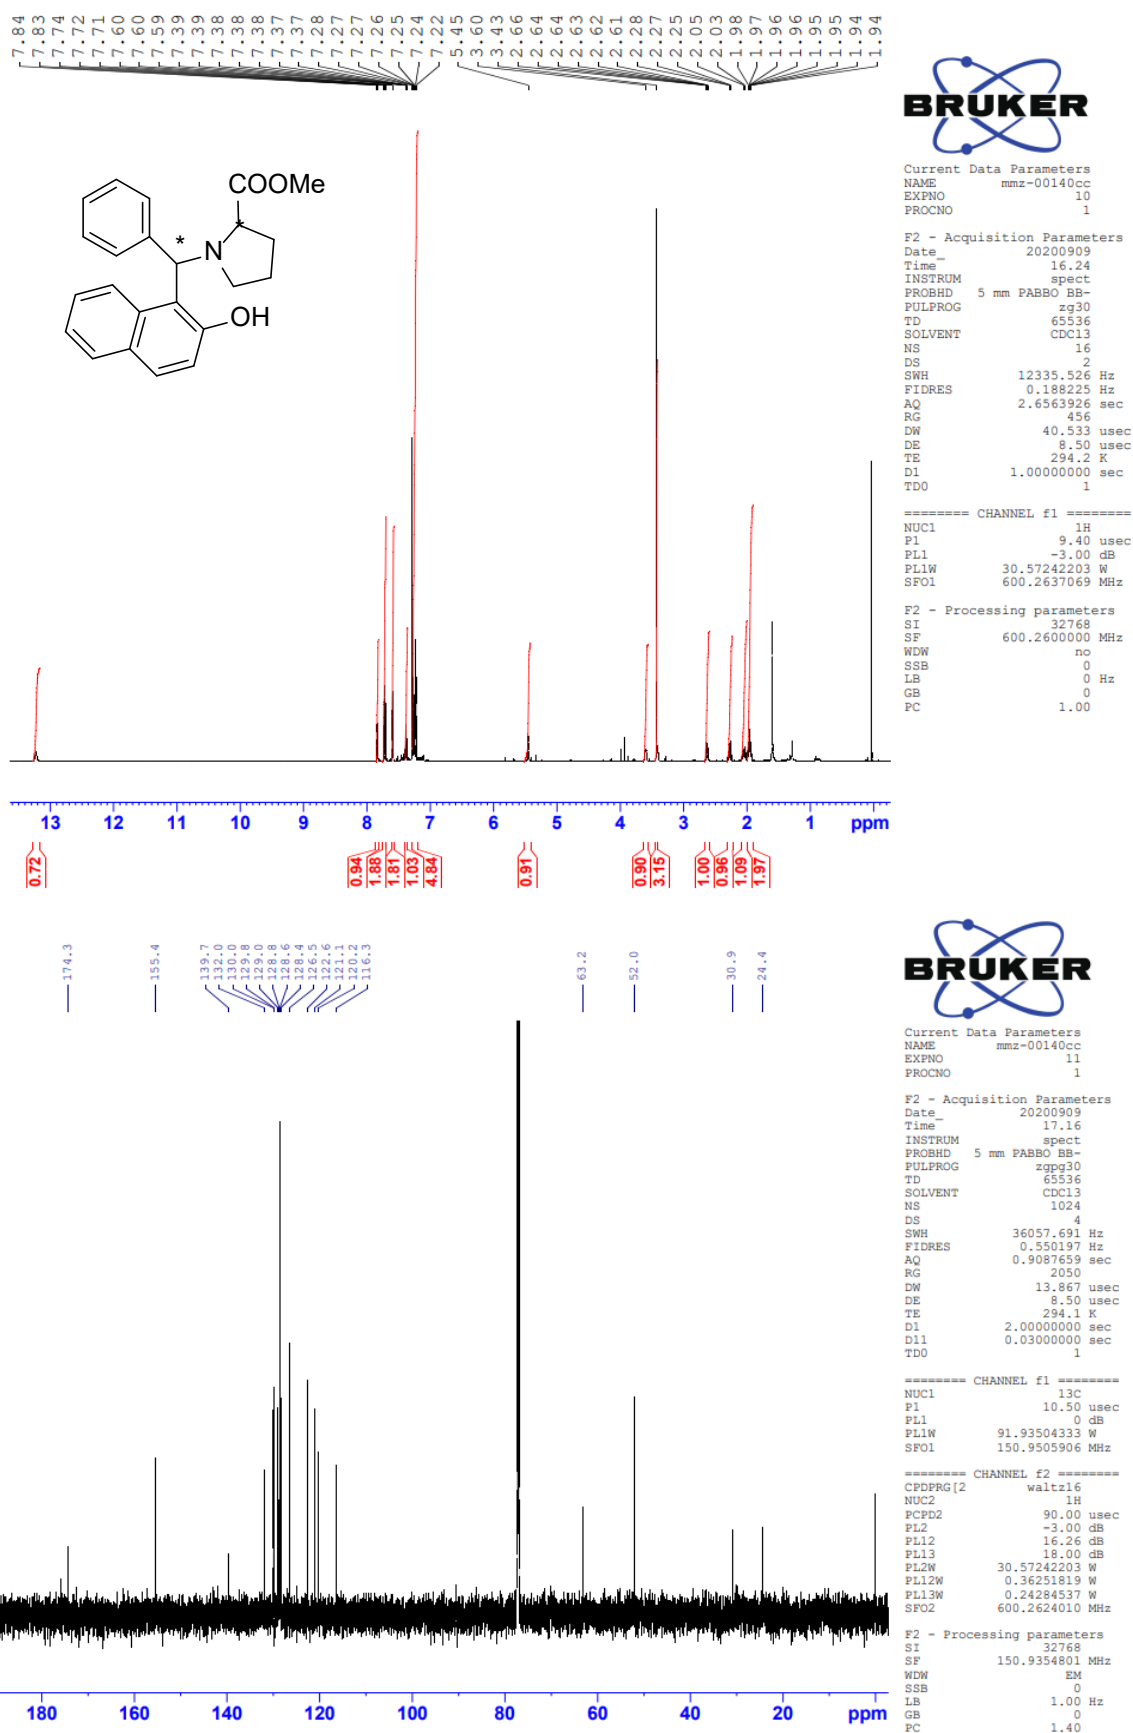

**Figure S5.** <sup>1</sup>H and <sup>13</sup>C NMR spectra of (*S,S*) and (*R,R*)-methyl ((2-hydroxynaphthalen-1-yl)(phenyl)methyl)-L-prolinate (MMZ-140C).

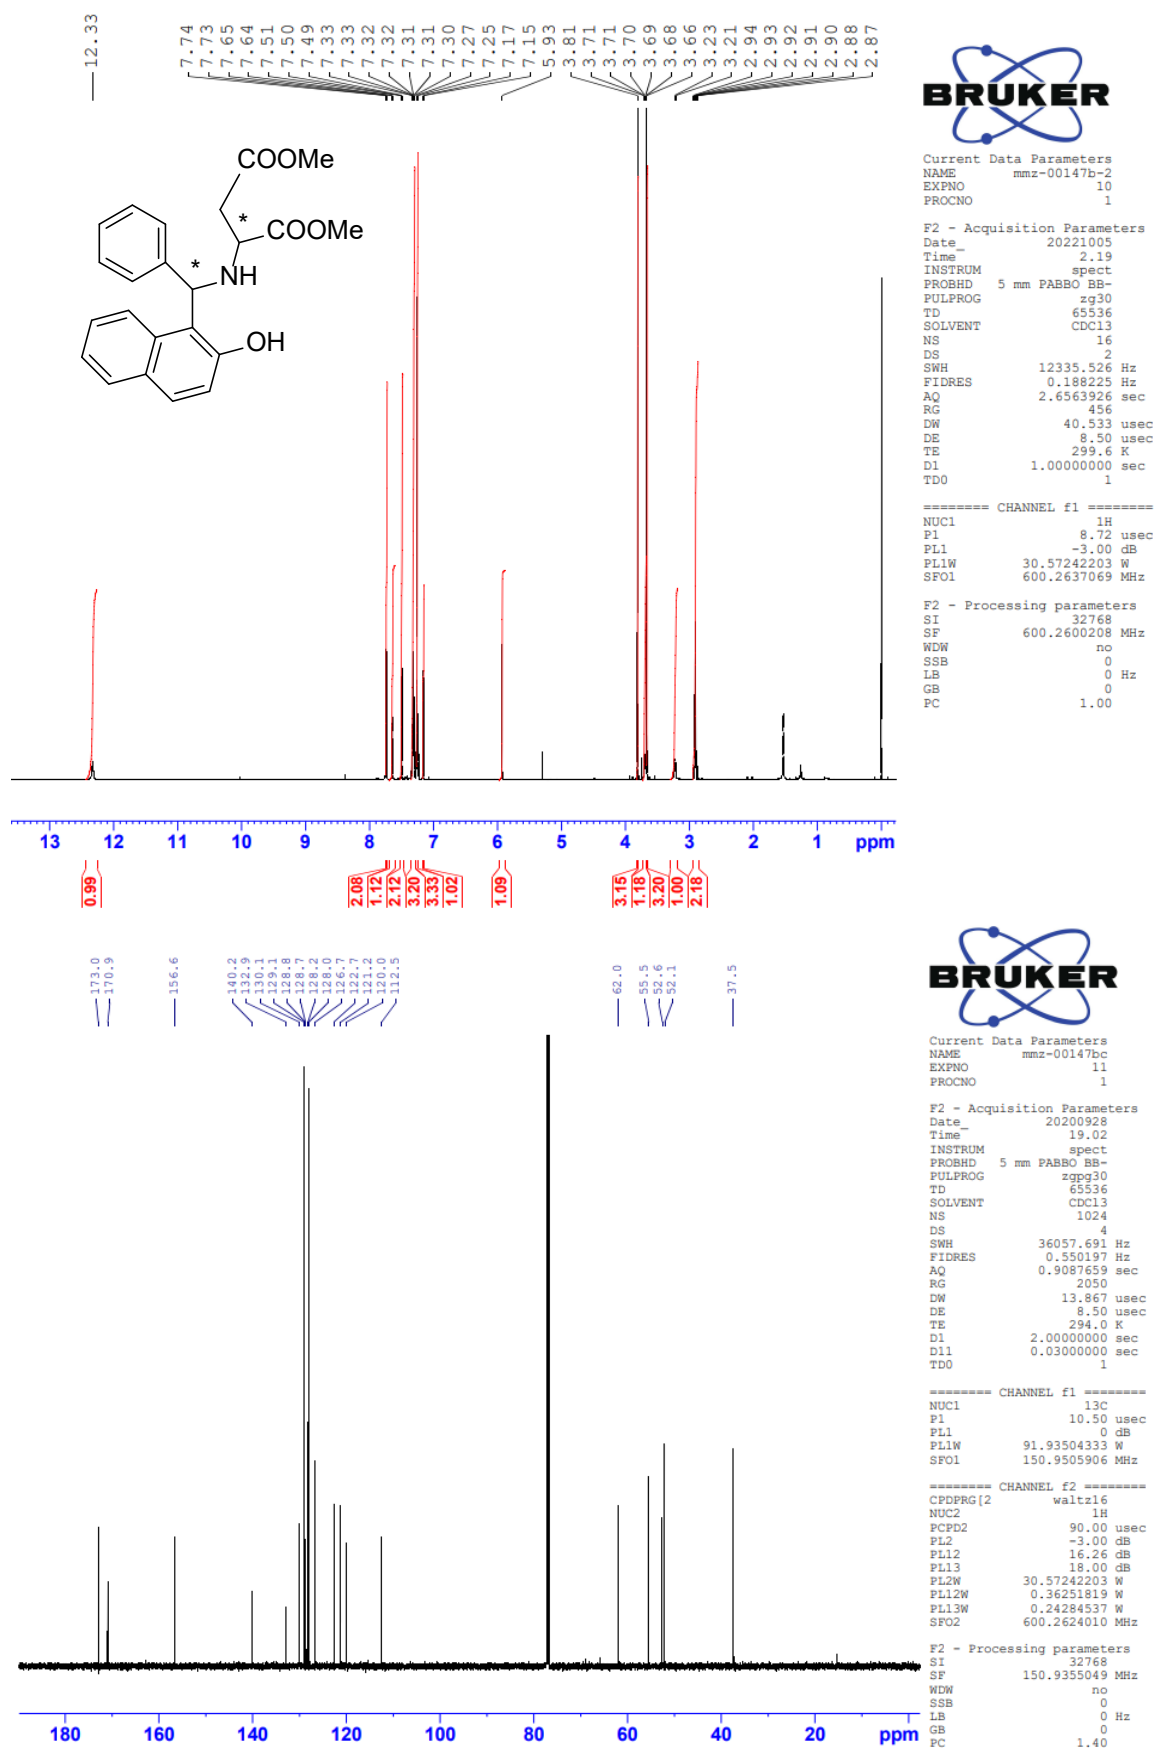

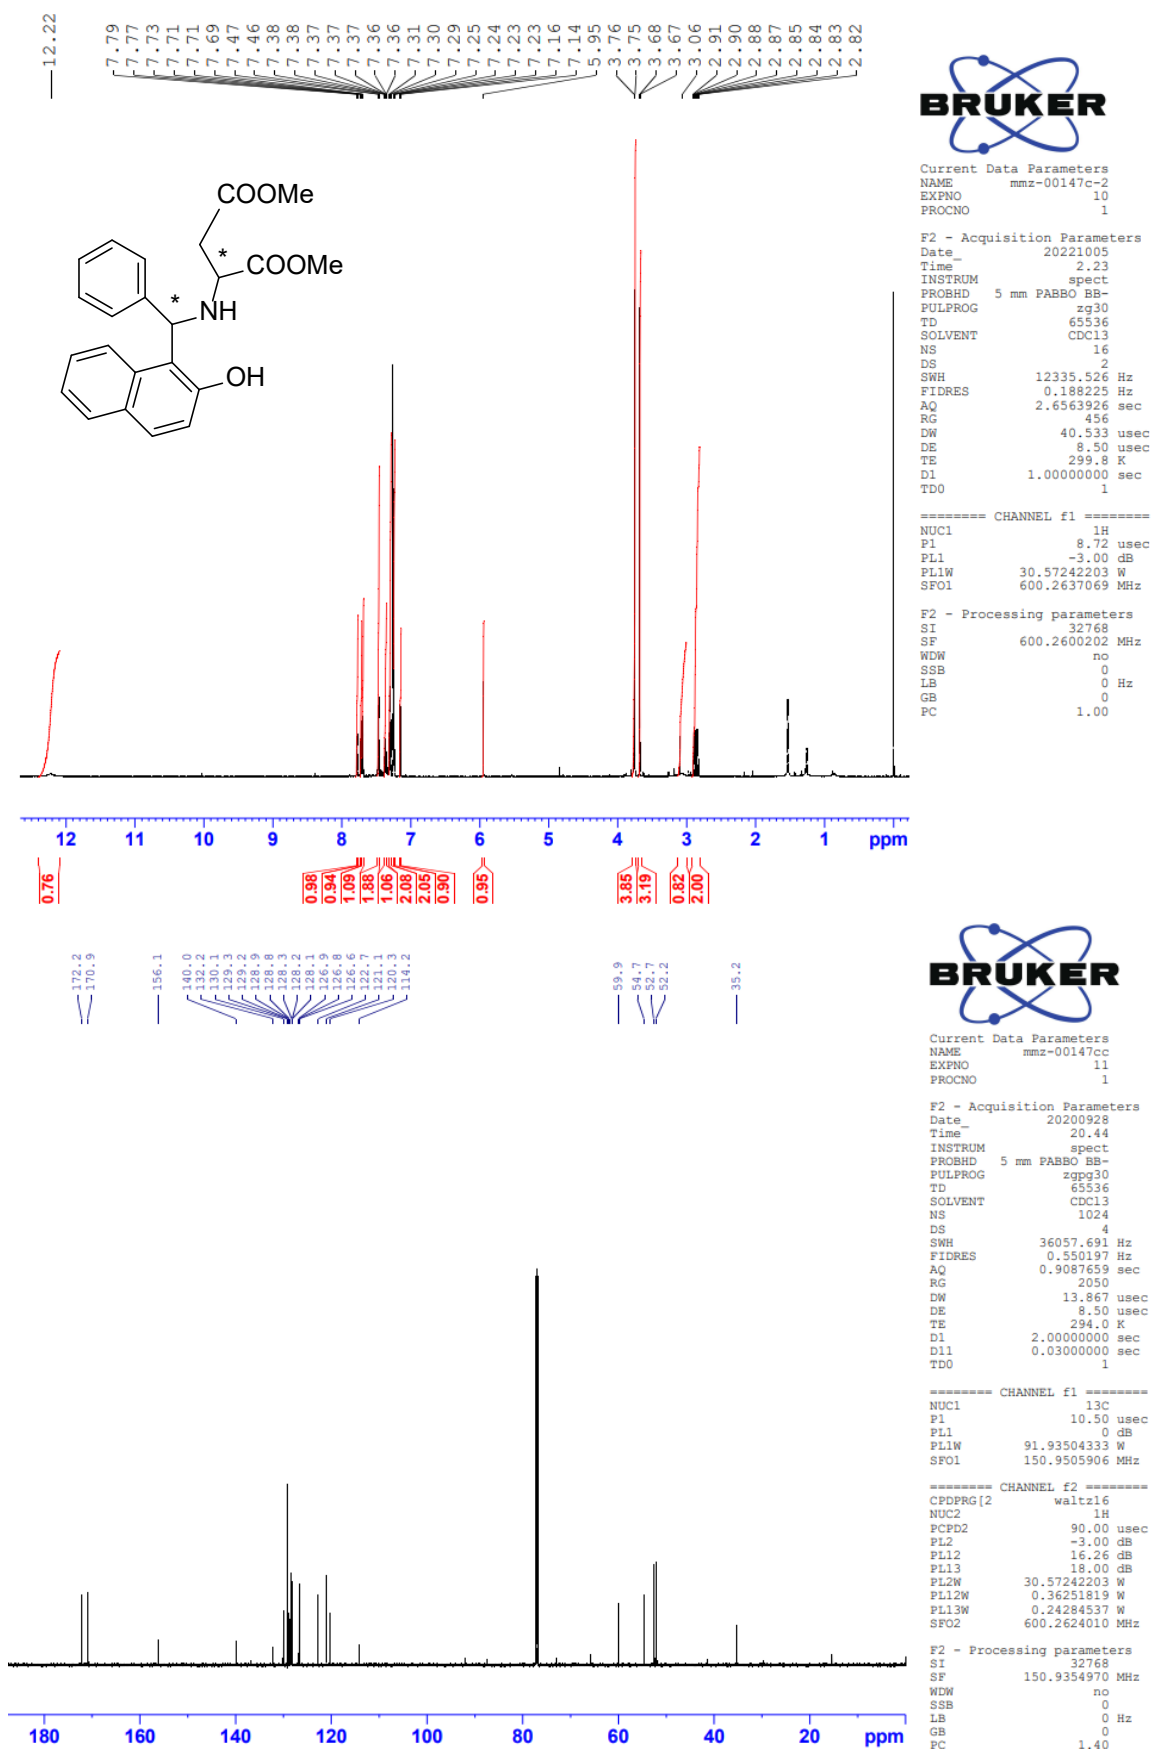

**Figure S7.** <sup>1</sup>H and <sup>13</sup>C NMR spectra of (*S,R*) and (*R,S*)-dimethyl ((2-hydroxynaphthalen-1-yl)(phenyl)methyl)-L-aspartate (MMZ-147C).



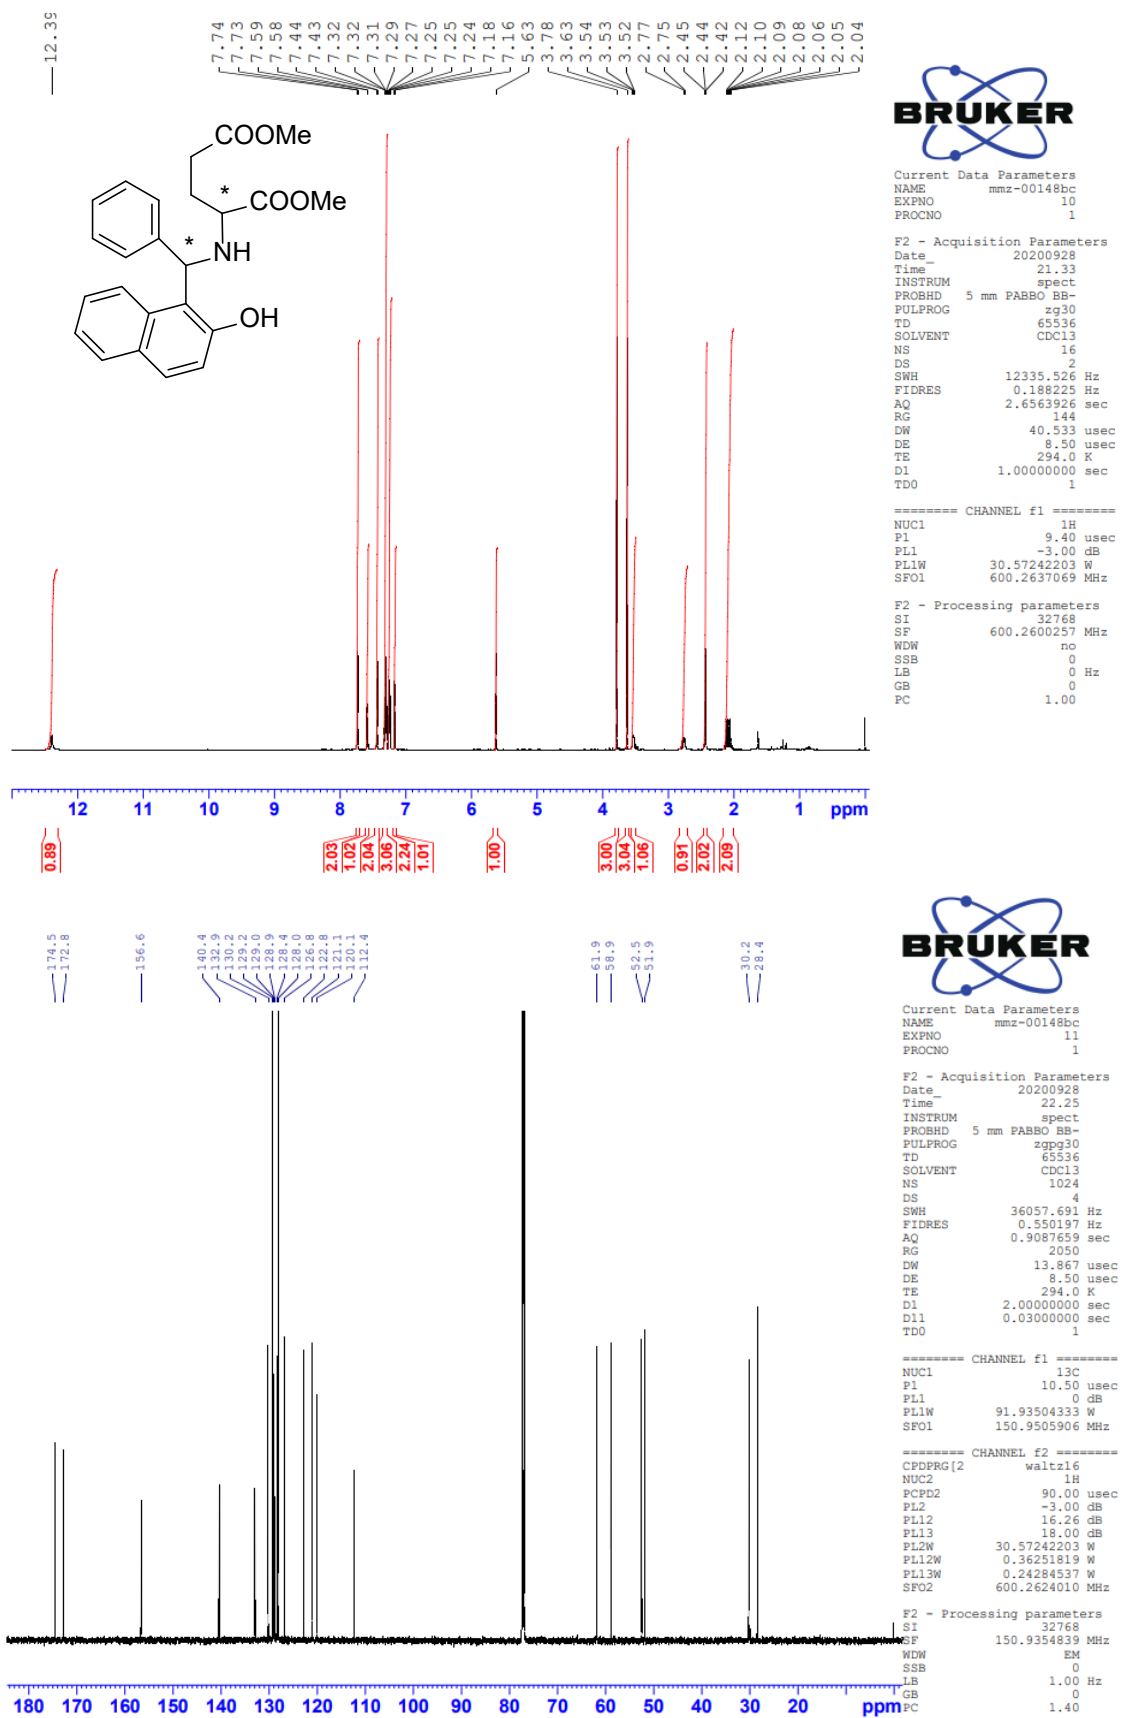

**Figure S8.** <sup>1</sup>H and <sup>13</sup>C NMR spectra of (*S,S*) and (*R,R*)-dimethyl ((2-hydroxynaphthalen-1-yl)(phenyl)methyl)-L-glutamate (MMZ-148B).

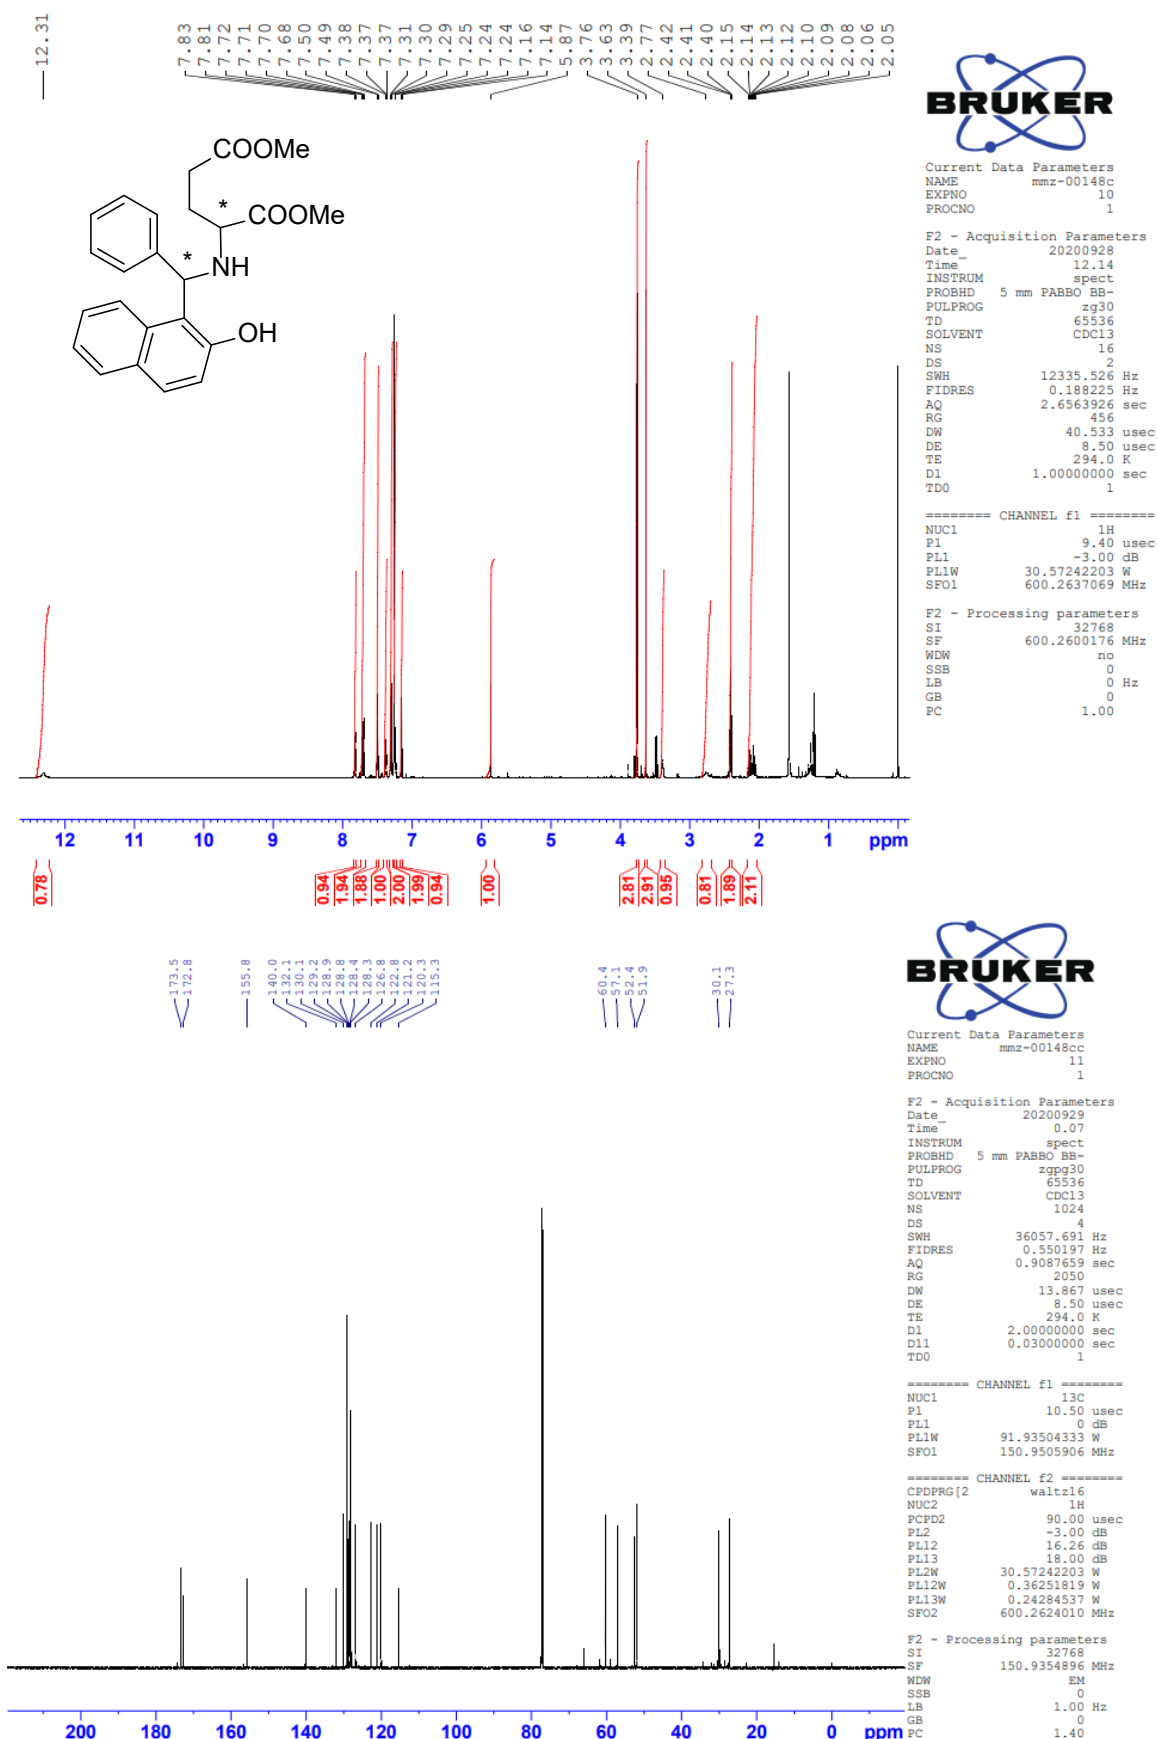

**Figure S9.** <sup>1</sup>H and <sup>13</sup>C NMR spectra of (S,R) and (R,S)-dimethyl ((2-hydroxynaphthalen-1-yl)(phenyl)methyl)-L-glutamate (MMZ-148C).

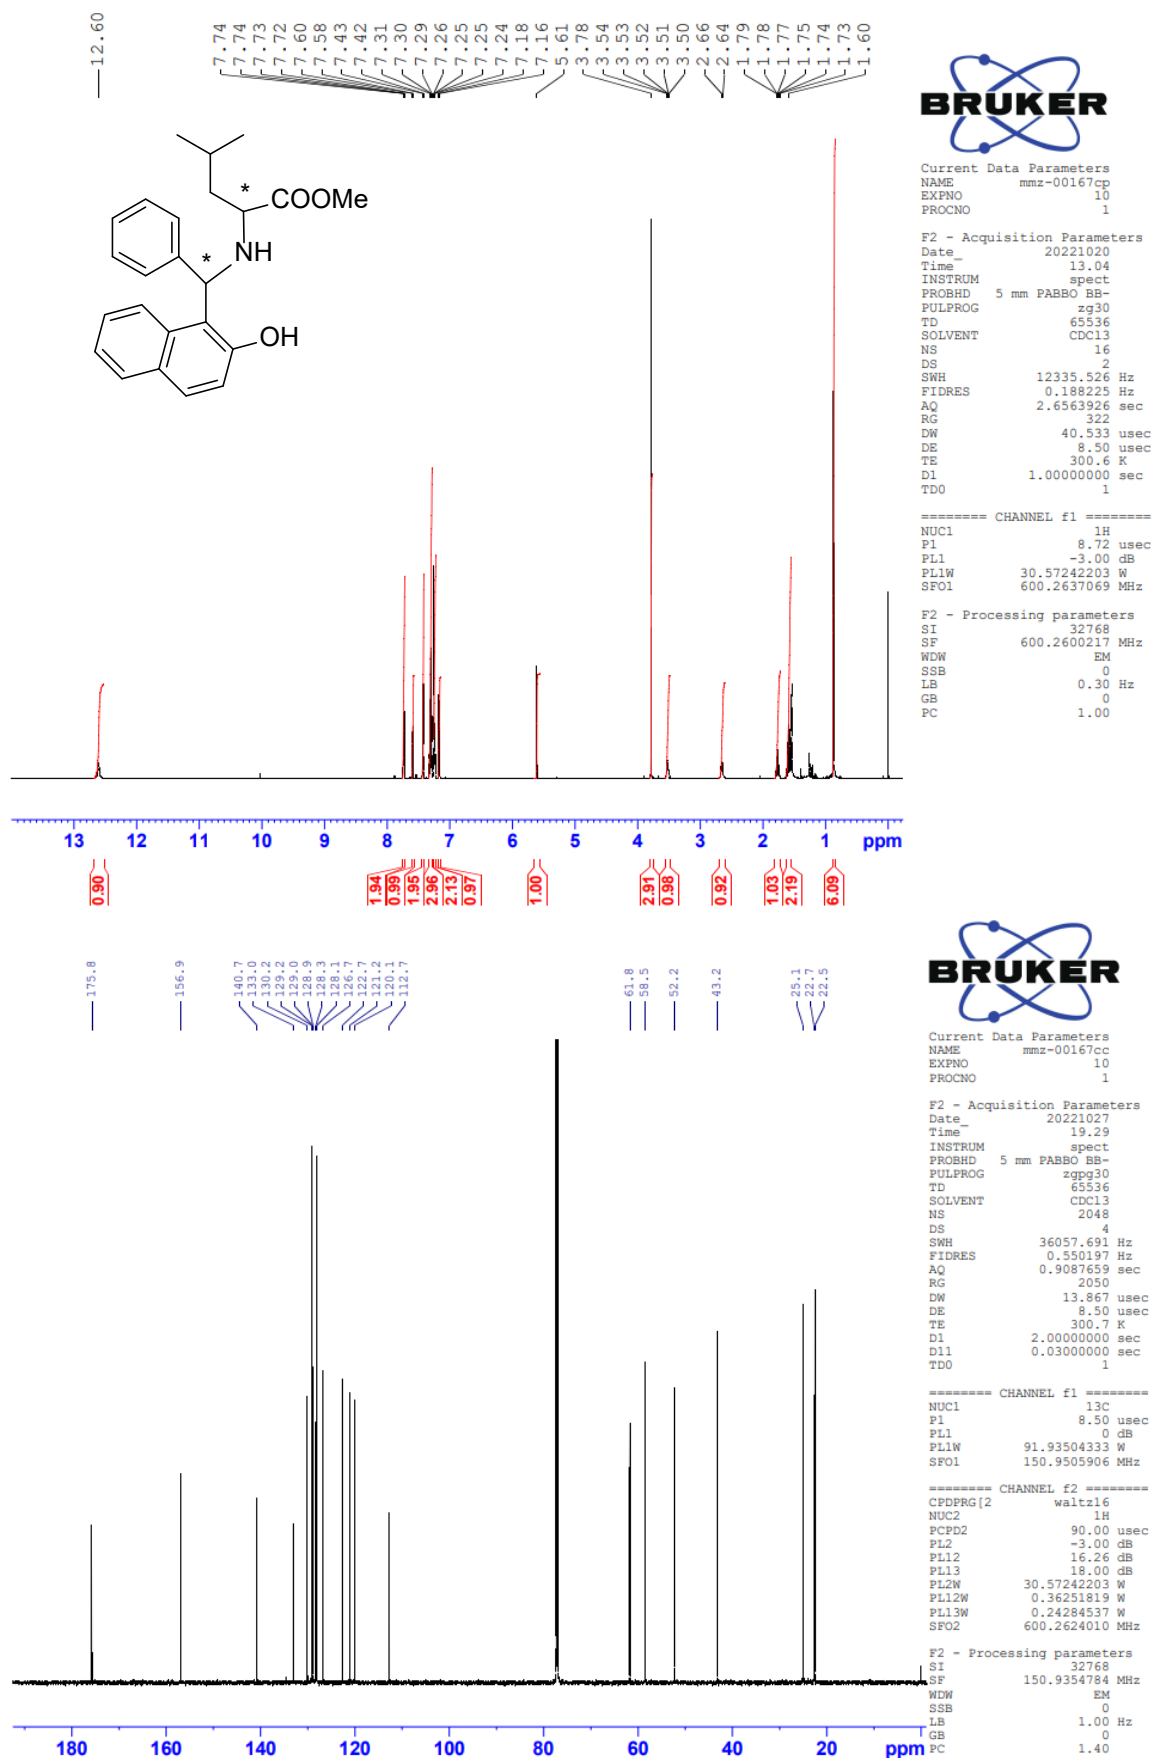

**Figure S10.** <sup>1</sup>H and <sup>13</sup>C NMR spectra of (S,S) and (R,R)-methyl ((2-hydroxynaphthalen-1-yl)(phenyl)methyl)-L-leucinate (MMZ-167C).

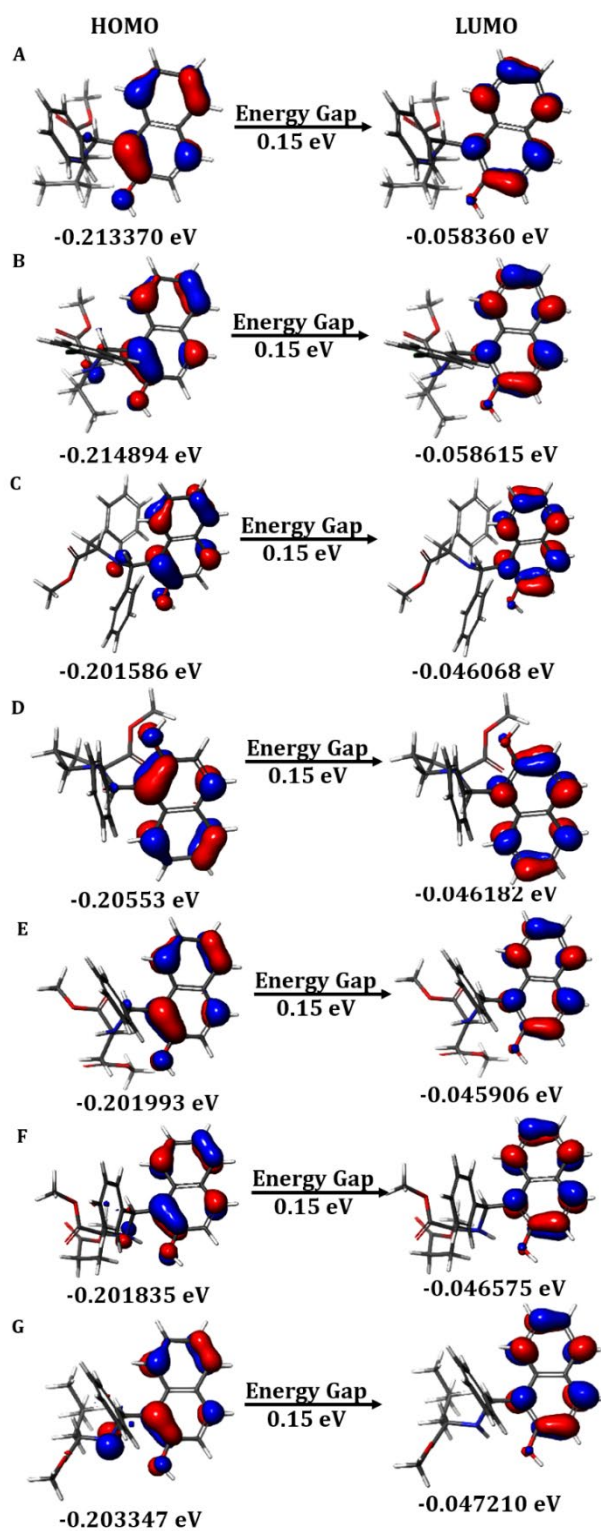

**Figure S11.** HOMO and LUMO distribution profile of the compounds. A) MMZ-33, B) MMZ-39, C) MMZ-45, D) MMZ-140, E) MMZ-147, F) MMZ-148, G) MMZ-167

**Table S1.** Results of 24-h and 72-h MTT assay. IC<sub>50</sub> values from two independent experiments (IC<sub>50(1)</sub> and IC<sub>50(2)</sub>) with corresponding coefficients of determination (R<sup>2</sup>), 95% confidence interval (95%CI) values and calculated mean IC<sub>50</sub> values ± SD.

| MMZ compound                    | IC <sub>50(1)</sub> | R <sup>2</sup> <sub>1</sub> | 95%CI of IC <sub>50</sub> | IC <sub>50(2)</sub> | R <sup>2</sup> <sub>2</sub> | 95%CI of IC <sub>50</sub> | Mean IC <sub>50</sub> ± SD |
|---------------------------------|---------------------|-----------------------------|---------------------------|---------------------|-----------------------------|---------------------------|----------------------------|
| BxPC-3 cell line                |                     |                             |                           |                     |                             |                           |                            |
| 24-h                            |                     |                             |                           |                     |                             |                           |                            |
| MMZ-33D                         | 47.82               | 0.99                        | 45.01-50.90               | 50.78               | 0.92                        | 39.76-55.82               | 49.3 ± 2.09                |
| MMZ-39AA                        | 61.40               | 0.97                        | 55.96-67.69               | 60.26               | 0.98                        | 55.74-60.69               | 60.83 ± 0.8                |
| MMZ-45AA                        | 58.07               | 0.92                        | 44.26-76.46               | 37.97               | 0.98                        | 33.92-47.09               | 48.02 ± 14.2               |
| MMZ-45B                         | 58.51               | 0.92                        | 43.78-77.85               | 40.5                | 0.95                        | 39.87-42.8                | 49.28 ± 13                 |
| MMZ-140C                        | 23.51               | 0.97                        | 19.46-27.49               | 36.8                | 0.98                        | 34.02-39.09               | 30.15 ± 9.39               |
| MMZ-147B                        | 44.77               | 0.97                        | 38.24-52.32               | 59.7                | 0.98                        | 42.08-61.24               | 52.23 ± 10.5               |
| MMZ-147CE                       | 54.06               | 0.95                        | 43.35-67.25               | 40.96               | 0.99                        | 38.08-48.08               | 47.51 ± 9.26               |
| MMZ-167C                        | 71.40               | 0.93                        | 55.94-92.40               | 60.98               | 0.97                        | 58.83-92.09               | 66.19 ± 7.36               |
| 5-Fluorouracil (reference drug) | 49.36               | 0.85                        | 31.35-74.53               | 28.61               | 0.83                        | 12.78-44.53               | 38.99 ± 14.67              |
| 72-h                            |                     |                             |                           |                     |                             |                           |                            |
| MMZ-33D                         | 50.02               | 0.95                        | 42.83-58.17               | 28.7                | 0.95                        | 23.72-33.96               | 39.36 ± 15.08              |
| MMZ-39AA                        | 44.78               | 0.91                        | 35.25-54.11               | 41.59               | 0.86                        | 31.37-51.07               | 43.19 ± 2.26               |
| MMZ-45AA                        | 12.1                | 0.87                        | 6.052-18.54               | 14.4                | 0.86                        | 6.83-22.1                 | 13.26 ± 1.6                |
| MMZ-45B                         | 35.6                | 0.96                        | 29.32-42.35               | 24.66               | 0.96                        | 20.04-29.43               | 30.13 ± 7.73               |
| MMZ-140C                        | 31.65               | 0.94                        | 24.2-39.64                | 33.19               | 0.9                         | 23.94-43.05               | 32.42 ± 1.09               |
| MMZ-147B                        | 69.81               | 0.76                        | 47.55-113.6               | 39.29               | 0.99                        | 36.04-42.59               | 54.55 ± 21.58              |
| MMZ-147CE                       | 59.58               | 0.87                        | 45.72-78.18               | 34.09               | 0.84                        | 20.83-49.06               | 46.84 ± 18.02              |
| MMZ-167C                        | 32.87               | 0.95                        | 26.48-39.36               | 31.24               | 0.96                        | 27-35.76                  | 32.06 ± 1.15               |
| 5-Fluorouracil (reference drug) | 14.78               | 0.94                        | 6.31-23.85                | 12.08               | 0.96                        | 5.94-18.44                | 13.43 ± 1.9                |
| HT-29 cell line                 |                     |                             |                           |                     |                             |                           |                            |
| 24-h                            |                     |                             |                           |                     |                             |                           |                            |
| MMZ-33D                         | 60.44               | 0.95                        | 51.44-72.81               | 61.89               | 0.98                        | 49.87-69.4                | 61.1 ± 1.02                |
| MMZ-39AA                        | 62.13               | 0.96                        | 55.04-70.74               | 64.05               | 0.98                        | 56.74-72.86               | 63.09 ± 1.36               |

|                                       |       |      |             |       |      |             |                |
|---------------------------------------|-------|------|-------------|-------|------|-------------|----------------|
| MMZ-45AA                              | 40.30 | 0.92 | 30.66-52.71 | 48.07 | 0.98 | 32.56-55.06 | 44.18 ± 5.49   |
| MMZ-45B                               | 29.00 | 0.96 | 23.54-34.65 | 34.56 | 0.97 | 31.02-38.9  | 31.78 ± 3.93   |
| MMZ-140C                              | 35.49 | 0.92 | 27.48-45.51 | 40.02 | 0.94 | 33.45-51.26 | 37.76 ± 3.2    |
| MMZ-147B                              | 44.24 | 0.92 | 34.17-56.48 | 46.78 | 0.93 | 37.27-59.02 | 45.51 ± 1.77   |
| MMZ-147CE                             | 113.0 | 0.74 | 73.61-168.5 | 110   | 0.85 | 78.02-154.2 | 111.5 ± 2.12   |
| MMZ-167C                              | 47.71 | 0.86 | 36.15-63.87 | 50.04 | 0.92 | 39.08-64.02 | 48,9 ± 1.65    |
| 5-Fluorouracil<br>(reference<br>drug) | 48.78 | 0.87 | 28.70-74.03 | 55.74 | 0.74 | 23.80-103.1 | 52.26 ± 4.9    |
| 72-h                                  |       |      |             |       |      |             |                |
| MMZ-33D                               | 32.31 | 0.94 | 25.27-39.44 | 43.42 | 0.94 | 35.48-51.3  | 37.87 ± 7.856  |
| MMZ-39AA                              | 50.64 | 0.89 | 39.39-60.75 | 65.58 | 0.98 | 63.83-67.33 | 58.11 ± 10.56  |
| MMZ-45AA                              | 12.24 | 0.96 | 8.75-16.17  | 11.89 | 0.97 | 9.134-14.78 | 12.07 ± 0.2475 |
| MMZ-45B                               | 29.63 | 0.97 | 24.96-34.47 | 38.67 | 0.85 | 28.78-48.19 | 34.15 ± 6.392  |
| MMZ-140C                              | 9.014 | 0.94 | 4.666-13.74 | 14.08 | 0.93 | 8.634-19.84 | 11.55 ± 3.582  |
| MMZ-147B                              | 12.19 | 0.97 | 9.162-15.34 | 17.56 | 0.61 | 1.06-40.32  | 14.88 ± 3.797  |
| MMZ-147CE                             | 37.12 | 0.89 | 24.78-51.84 | 46.06 | 0.94 | 1.584-1.738 | 41.59 ± 6.322  |
| MMZ-167C                              | 27.82 | 0.87 | 16.88-36.62 | 28.35 | 0.99 | 25.74-31.04 | 28.09 ± 0.3748 |
| 5-Fluorouracil<br>(reference<br>drug) | 5.16  | 0.98 | 2.486-8.625 | 3.6   | 0.99 | 1.9-5.94    | 4.38 ± 1.1     |

**Table S2.** The predicted molecular targets **MMZ** compounds using SuperPred 3.0 webserver.

| Target Name                                                           | ChEMBL-ID         | UniProt ID | PDB<br>Visualization | Probability | Model accuracy |
|-----------------------------------------------------------------------|-------------------|------------|----------------------|-------------|----------------|
| <b>MMZ-33</b>                                                         |                   |            |                      |             |                |
| DNA-(apurinic or apyrimidinic site) lyase                             | CHEMBL5619        | P27695     | 6BOW                 | 97%         | 91%            |
| Endoplasmic reticulum-associated amyloid beta-peptide-binding protein | CHEMBL4159        | Q99714     | 2O23                 | 94%         | 70%            |
| Transcription intermediary factor 1-alpha                             | CHEMBL310863<br>8 | O15164     | 4YBM                 | 93%         | 96%            |
| Thyroid hormone receptor alpha                                        | CHEMBL1860        | P10827     | 3ILZ                 | 93%         | 99%            |
| Cyclooxygenase-1                                                      | CHEMBL221         | P23219     | 6Y3C                 | 90%         | 90%            |
| Glucose transporter                                                   | CHEMBL2535        | P11166     | 6THA                 | 90%         | 99%            |
| Casein kinase II alpha/beta                                           | CHEMBL303847<br>7 | P67870     | 6TLS                 | 90%         | 99%            |
| Cathepsin B                                                           | CHEMBL4072        | P07858     | 3PBH                 | 88%         | 94%            |
| Nuclear receptor ROR-beta                                             | CHEMBL309126<br>8 | Q92753     | N/A                  | 88%         | 95,5%          |
| Nuclear factor NF-kappa-B p105 subunit                                | CHEMBL3251        | P19838     | 1SVC                 | 88%         | 96%            |
| Muscarinic acetylcholine receptor M4                                  | CHEMBL1821        | P08173     | 5DSG                 | 87%         | 94%            |
| Cathepsin D                                                           | CHEMBL2581        | P07339     | 4OD9                 | 84,9%       | 99%            |
| Glycine transporter 2                                                 | CHEMBL3060        | Q9Y345     | N/A                  | 84%         | 99%            |
| Muscarinic acetylcholine receptor M5                                  | CHEMBL2035        | P08912     | 6OL9                 | 83%         | 95%            |
| Pregnane X receptor                                                   | CHEMBL3401        | O75469     | 6TFI                 | 82%         | 95%            |
| Neuronal acetylcholine receptor; alpha4/beta4                         | CHEMBL190759<br>1 | P30926     | 6UR8                 | 81%         | 100%           |
| Hypoxia-inducible factor 1 alpha                                      | CHEMBL4261        | Q16665     | 4H6J                 | 80,3%       | 85%            |

|                                                                       |               |        |      |     |       |
|-----------------------------------------------------------------------|---------------|--------|------|-----|-------|
| Nuclear factor erythroid 2-related factor 2                           | CHEMBL1075094 | Q16236 | 2FLU | 80% | 96%   |
| MMZ-39                                                                |               |        |      |     |       |
| DNA-(apurinic or apyrimidinic site) lyase                             | CHEMBL5619    | P27695 | 6BOW | 99% | 91%   |
| Endoplasmic reticulum-associated amyloid beta-peptide-binding protein | CHEMBL4159    | Q99714 | 2O23 | 98% | 70%   |
| Cathepsin B                                                           | CHEMBL4072    | P07858 | 3PBH | 97% | 94%   |
| Pregnane X receptor                                                   | CHEMBL3401    | O75469 | 6TFI | 94% | 95%   |
| Transcription intermediary factor 1-alpha                             | CHEMBL3108638 | O15164 | 4YBM | 92% | 96%   |
| Thyroid hormone receptor alpha                                        | CHEMBL1860    | P10827 | 3ILZ | 91% | 99%   |
| Lysosomal Pro-X carboxypeptidase                                      | CHEMBL2335    | P42785 | 3N2Z | 91% | 100%  |
| Dipeptidyl peptidase II                                               | CHEMBL3976    | Q9UHL4 | 4EBB | 90% | 92%   |
| Cyclooxygenase-1                                                      | CHEMBL221     | P23219 | 6Y3C | 88% | 90%   |
| C5a anaphylatoxin chemotactic receptor                                | CHEMBL2373    | P21730 | 6C1R | 87% | 93%   |
| Beta-glucuronidase                                                    | CHEMBL2728    | P08236 | 3HN3 | 87% | 78%   |
| Excitatory amino acid transporter 1                                   | CHEMBL3085    | P43003 | 5LM4 | 87% | 95%   |
| Proteasome component C5                                               | CHEMBL4208    | P20618 | 6KWY | 86% | 90%   |
| Nuclear receptor ROR-beta                                             | CHEMBL3091268 | Q92753 | N/A  | 86% | 95,5% |
| Dual specificity protein kinase CLK4                                  | CHEMBL4203    | Q9HAZ1 | 6FYV | 85% | 94%   |
| Nuclear factor NF-kappa-B p105 subunit                                | CHEMBL3251    | P19838 | 1SVC | 84% | 96%   |
| Cannabinoid CB1 receptor                                              | CHEMBL218     | P21554 | 6N4B | 83% | 97%   |



|                                                                       |               |        |      |       |       |
|-----------------------------------------------------------------------|---------------|--------|------|-------|-------|
| Nuclear factor erythroid 2-related factor 2                           | CHEMBL1075094 | Q16236 | 2FLU | 81%   | 96%   |
| Glucose transporter                                                   | CHEMBL2535    | P11166 | 6THA | 81%   | 99%   |
| Dual specificity protein phosphatase 3                                | CHEMBL2635    | P51452 | 3F81 | 81%   | 94%   |
| Tyrosyl-DNA phosphodiesterase 1                                       | CHEMBL1075138 | Q9NUW8 | 6N0D | 80%   | 71%   |
| MMZ-45                                                                |               |        |      |       |       |
| Endoplasmic reticulum-associated amyloid beta-peptide-binding protein | CHEMBL4159    | Q99714 | 2O23 | 99%   | 70%   |
| Cyclooxygenase-1                                                      | CHEMBL221     | P23219 | 6Y3C | 99%   | 90%   |
| DNA-(apurinic or apyrimidinic site) lyase                             | CHEMBL5619    | P27695 | 6BOW | 95%   | 91%   |
| Cathepsin D                                                           | CHEMBL2581    | P07339 | 4OD9 | 94,8% | 99%   |
| Protein Mdm4                                                          | CHEMBL1255126 | O15151 | 6Q9Y | 91%   | 90,2% |
| Nuclear receptor ROR-beta                                             | CHEMBL3091268 | Q92753 | N/A  | 91%   | 95,5% |
| Nuclear factor NF-kappa-B p105 subunit                                | CHEMBL3251    | P19838 | 1SVC | 91%   | 96%   |
| Tyrosyl-DNA phosphodiesterase 1                                       | CHEMBL1075138 | Q9NUW8 | 6N0D | 91%   | 71%   |
| Transcription intermediary factor 1-alpha                             | CHEMBL3108638 | O15164 | 4YBM | 91%   | 96%   |
| Thyroid hormone receptor alpha                                        | CHEMBL1860    | P10827 | 3ILZ | 90%   | 99%   |
| Glycine transporter 2                                                 | CHEMBL3060    | Q9Y345 | N/A  | 90%   | 99%   |
| Muscarinic acetylcholine receptor M5                                  | CHEMBL2035    | P08912 | 6OL9 | 87%   | 95%   |
| Calpain 1                                                             | CHEMBL3891    | P07384 | 1ZCM | 85%   | 93%   |
| Glucose transporter                                                   | CHEMBL2535    | P11166 | 6THA | 84%   | 99%   |
| Kruppel-like factor 5                                                 | CHEMBL1293249 | Q13887 | N/A  | 83%   | 86%   |

|                                                                                        |                   |        |      |       |      |
|----------------------------------------------------------------------------------------|-------------------|--------|------|-------|------|
| Peptidyl-prolyl<br>cis-trans<br>isomerase                                              | CHEMBL2288        | Q13526 | 1PIN | 82,4% | 92%  |
| NIMA-<br>interacting 1<br>Dipeptidyl<br>peptidase II                                   | CHEMBL3976        | Q9UHL4 | 4EBB | 82%   | 92%  |
| G-protein<br>coupled receptor<br>55                                                    | CHEMBL107532<br>2 | Q9Y2T6 | N/A  | 82%   | 78%  |
| Casein kinase II<br>alpha/beta                                                         | CHEMBL303847<br>7 | P67870 | 6TLS | 81%   | 99%  |
| Neuronal<br>acetylcholine<br>receptor;<br>alpha4/beta4                                 | CHEMBL190759<br>1 | P30926 | 6UR8 | 81%   | 100% |
| Dual specificity<br>protein kinase<br>CLK4                                             | CHEMBL4203        | Q9HAZ1 | 6FYV | 80%   | 94%  |
| MMZ-140                                                                                |                   |        |      |       |      |
| Endoplasmic<br>reticulum-<br>associated<br>amyloid beta-<br>peptide-binding<br>protein | CHEMBL4159        | Q99714 | 2O23 | 99%   | 70%  |
| DNA-(apurinic<br>or apyrimidinic<br>site) lyase                                        | CHEMBL5619        | P27695 | 6BOW | 96%   | 91%  |
| Butyrylcholineste<br>rase                                                              | CHEMBL1914        | P06276 | 5LKR | 95%   | 95%  |
| Transcription<br>intermediary<br>factor 1-alpha                                        | CHEMBL310863<br>8 | O15164 | 4YBM | 95%   | 96%  |
| Casein kinase II<br>alpha/beta                                                         | CHEMBL303847<br>7 | P67870 | 6TLS | 94%   | 99%  |
| Nuclear factor<br>NF-kappa-B p105<br>subunit                                           | CHEMBL3251        | P19838 | 1SVC | 93%   | 96%  |
| Cytochrome<br>P450 3A4                                                                 | CHEMBL340         | P08684 | 5VCC | 92%   | 91%  |
| Cyclooxygenase-<br>1                                                                   | CHEMBL221         | P23219 | 6Y3C | 90%   | 90%  |
| Thyroid<br>hormone<br>receptor alpha                                                   | CHEMBL1860        | P10827 | 3ILZ | 89%   | 99%  |
| Cathepsin D                                                                            | CHEMBL2581        | P07339 | 4OD9 | 89%   | 99%  |
| Glucose<br>transporter                                                                 | CHEMBL2535        | P11166 | 6THA | 88%   | 99%  |
| Cyclooxygenase-<br>2                                                                   | CHEMBL230         | P35354 | 5F19 | 87%   | 90%  |

|                                                                                        |                   |        |      |       |       |
|----------------------------------------------------------------------------------------|-------------------|--------|------|-------|-------|
| HERG                                                                                   | CHEMBL240         | Q12809 | 5VA1 | 84%   | 90%   |
| C5a<br>anaphylatoxin<br>chemotactic<br>receptor                                        | CHEMBL2373        | P21730 | 6C1R | 83%   | 93%   |
| Hypoxia-<br>inducible factor 1<br>alpha                                                | CHEMBL4261        | Q16665 | 4H6J | 79,9% | 85%   |
| ADAM10                                                                                 | CHEMBL5028        | O14672 | 6BE6 | 80%   | 97,5% |
| MMZ-147                                                                                |                   |        |      |       |       |
| Endoplasmic<br>reticulum-<br>associated<br>amyloid beta-<br>peptide-binding<br>protein | CHEMBL4159        | Q99714 | 2O23 | 99%   | 70%   |
| DNA-(apurinic<br>or apyrimidinic<br>site) lyase                                        | CHEMBL5619        | P27695 | 6BOW | 98%   | 91%   |
| Cyclooxygenase-<br>1                                                                   | CHEMBL221         | P23219 | 6Y3C | 97%   | 90%   |
| Tyrosyl-DNA<br>phosphodiesterase 1                                                     | CHEMBL107513<br>8 | Q9NUW8 | 6N0D | 93%   | 71%   |
| Nuclear factor<br>NF-kappa-B p105<br>subunit                                           | CHEMBL3251        | P19838 | 1SVC | 92%   | 96%   |
| Transcription<br>intermediary<br>factor 1-alpha                                        | CHEMBL310863<br>8 | O15164 | 4YBM | 91%   | 96%   |
| Thyroid<br>hormone<br>receptor alpha                                                   | CHEMBL1860        | P10827 | 3ILZ | 91%   | 99%   |
| Muscarinic<br>acetylcholine<br>receptor M5                                             | CHEMBL2035        | P08912 | 6OL9 | 89%   | 95%   |
| Glycine<br>transporter 2                                                               | CHEMBL3060        | Q9Y345 | N/A  | 88%   | 99%   |
| Nuclear receptor<br>ROR-beta                                                           | CHEMBL309126<br>8 | Q92753 | N/A  | 87%   | 95,5% |
| Casein kinase II<br>alpha/beta                                                         | CHEMBL303847<br>7 | P67870 | 6TLS | 86,8% | 99%   |
| Cathepsin D                                                                            | CHEMBL2581        | P07339 | 4OD9 | 86%   | 99%   |
| Kruppel-like<br>factor 5                                                               | CHEMBL129324<br>9 | Q13887 | N/A  | 85%   | 86%   |
| ADAM10                                                                                 | CHEMBL5028        | O14672 | 6BE6 | 81%   | 97,5% |
| Glucose<br>transporter                                                                 | CHEMBL2535        | P11166 | 6THA | 80%   | 99%   |

|                                                                       |                   |        |      |       |       |
|-----------------------------------------------------------------------|-------------------|--------|------|-------|-------|
| Nuclear factor erythroid 2-related factor 2                           | CHEMBL107509<br>4 | Q16236 | 2FLU | 80%   | 96%   |
| MMZ-167                                                               |                   |        |      |       |       |
| Endoplasmic reticulum-associated amyloid beta-peptide-binding protein | CHEMBL4159        | Q99714 | 2O23 | 98%   | 70%   |
| Cyclooxygenase-1                                                      | CHEMBL221         | P23219 | 6Y3C | 98%   | 90%   |
| DNA-(apurinic or apyrimidinic site) lyase                             | CHEMBL5619        | P27695 | 6BOW | 97%   | 91%   |
| Nuclear factor NF-kappa-B p105 subunit                                | CHEMBL3251        | P19838 | 1SVC | 94%   | 96%   |
| Cathepsin D                                                           | CHEMBL2581        | P07339 | 4OD9 | 94,1% | 99%   |
| Thyroid hormone receptor alpha                                        | CHEMBL1860        | P10827 | 3ILZ | 91%   | 99%   |
| Transcription intermediary factor 1-alpha                             | CHEMBL310863<br>8 | O15164 | 4YBM | 91%   | 96%   |
| HERG                                                                  | CHEMBL240         | Q12809 | 5VA1 | 87%   | 90%   |
| Glycine transporter 2                                                 | CHEMBL3060        | Q9Y345 | N/A  | 86%   | 99%   |
| Muscarinic acetylcholine receptor M4                                  | CHEMBL1821        | P08173 | 5DSG | 85%   | 94%   |
| Casein kinase II alpha/beta                                           | CHEMBL303847<br>7 | P67870 | 6TLS | 85%   | 99%   |
| Muscarinic acetylcholine receptor M5                                  | CHEMBL2035        | P08912 | 6OL9 | 85%   | 95%   |
| Nuclear receptor ROR-beta                                             | CHEMBL309126<br>8 | Q92753 | N/A  | 84,7% | 95,5% |
| Nuclear factor erythroid 2-related factor 2                           | CHEMBL107509<br>4 | Q16236 | 2FLU | 85%   | 96%   |
| Neuronal acetylcholine receptor; alpha4/beta4                         | CHEMBL190759<br>1 | P30926 | 6UR8 | 84%   | 100%  |
| Kruppel-like factor 5                                                 | CHEMBL129324<br>9 | Q13887 | N/A  | 83%   | 86%   |

**Table S3.** Molecular docking results of Betti reaction products (**MMZ**-compounds) as well as all the reference ligands.

| Drug Target                          | PDB Code | MMZ-33 | MMZ-39 | MMZ-45        | MMZ-140 | MMZ-147 | MMZ-167 | Reported inhibitor |
|--------------------------------------|----------|--------|--------|---------------|---------|---------|---------|--------------------|
| SwissTargetPrediction                |          |        |        |               |         |         |         |                    |
| Kinases                              |          |        |        |               |         |         |         |                    |
| AKT1                                 | 6CCY     | -7.03  | -7.63  | -8.66         | -8.05   | -6.53   | -7.95   | -12.46             |
| AURKB                                | 4AF3     | -7.82  | -7.41  | -8.36         | -8.47   | -6.57   | -7.25   | -9.88              |
| CDK1                                 | 6GU6     | -7.76  | -7.50  | <b>-9.02</b>  | -7.93   | -7.58   | -7.67   | -8.41              |
| CDK2                                 | 2FVD     | -6.63  | -6.91  | <b>-9.20</b>  | -7.87   | -6.37   | -7.22   | -8.97              |
| EGFR                                 | 7VRA     | -5.71  | -6.47  | -6.89         | -6.65   | -5.56   | -6.46   | -11.34             |
| FGFR                                 | 5AM6     | -5.54  | -5.45  | -6.58         | -6.41   | -5.38   | -5.68   | -7.64              |
| FLT3                                 | 4RT7     | -6.11  | -6.29  | -7.20         | -5.44   | -4.73   | -5.78   | -12.71             |
| JAK2                                 | 2B7A     | -6.75  | -7.12  | -7.97         | -7.41   | -6.57   | -6.92   | -8.60              |
| JAK3                                 | 3PJC     | -7.70  | -8.46  | -9.35         | -8.67   | -7.89   | -8.54   | -9.63              |
| PLK1                                 | 3FC2     | -6.26  | -7.09  | <b>-7.68</b>  | -6.57   | -5.27   | -5.74   | -6.32              |
| PRKCQ                                | 4Q9Z     | -8.21  | -7.84  | -8.66         | -8.33   | -8.29   | -7.76   | -9.50              |
| RIPK2                                | 5W5O     | -6.58  | -6.39  | -7.61         | -7.07   | -6.74   | -6.69   | -7.72              |
| Family A/G protein-coupled receptors |          |        |        |               |         |         |         |                    |
| ADORA1                               | 6D9H     | -7.25  | -7.27  | <b>-8.72</b>  | -7.35   | -7.49   | -7.52   | -6.42              |
| Protease                             |          |        |        |               |         |         |         |                    |
| BACE1                                | 4IVT     | -6.72  | -7.10  | -7.67         | -6.93   | -6.60   | -6.20   | -10.40             |
| BACE2                                | 2EWY     | -7.49  | -7.60  | -8.63         | -8.33   | -7.06   | -7.68   | -10.93             |
| LTA4H                                | 5N3W     | -6.19  | -7.28  | -8.10         | -6.59   | -6.37   | -7.12   | -8.37              |
| CAPN1                                | 2NQG     | -5.44  | -5.66  | <b>-6.52</b>  | -5.95   | -4.94   | -5.85   | -2.59              |
| MMP16                                | 1RM8     | -8.74  | -8.76  | -9.72         | -8.13   | -7.93   | -7.92   | -8.60              |
| Phosphodiesterase                    |          |        |        |               |         |         |         |                    |
| PDE2A                                | 5U7D     | -8.45  | -8.01  | -9.07         | -8.37   | -7.36   | -8.65   | -10.30             |
| PDE5                                 | 2H42     | -7.77  | -8.44  | <b>-10.31</b> | -8.00   | -8.02   | -8.23   | -9.62              |
| PDE4B                                | 4KP6     | -8.30  | -8.45  | <b>-10.11</b> | -8.56   | -7.23   | -8.11   | -8.98              |
| PDE7A                                | 4PM0     | -7.29  | -7.94  | <b>-9.18</b>  | -8.52   | -6.83   | -7.57   | -7.93              |

|                                            |      |        |        |              |        |       |       |        |
|--------------------------------------------|------|--------|--------|--------------|--------|-------|-------|--------|
| <b>PDE10A</b>                              | 3WI2 | -6.64  | -6.71  | -8.38        | -7.25  | -6.96 | -6.94 | -10.77 |
| Enzyme                                     |      |        |        |              |        |       |       |        |
| <b>HSD17B2</b>                             | 3HB4 | -9.53  | -9.96  | -12.29       | -10.07 | -9.22 | -9.93 | -12.97 |
| <b>IDH1</b>                                | 5LGE | -5.96  | -5.72  | <b>-6.90</b> | -6.75  | -5.47 | -6.14 | -6.51  |
| <b>LDHA</b>                                | 6MV8 | -6.46  | -6.05  | -6.44        | -6.36  | -5.30 | -5.98 | -8.65  |
| Cytochrome                                 |      |        |        |              |        |       |       |        |
| <b>CYP11B1</b>                             | 6M7X | -7.32  | -7.46  | -7.94        | -6.90  | -6.96 | -7.33 | -6.73  |
| <b>CYP11B2</b>                             | 4ZGX | -8.00  | -8.51  | -9.32        | -8.02  | -7.76 | -7.86 | -7.84  |
| Transcription factor                       |      |        |        |              |        |       |       |        |
| <b>STAT3</b>                               | 6NUQ | -4.58  | -4.93  | -5.44        | -4.76  | -4.13 | -4.88 | -6.25  |
| Reader                                     |      |        |        |              |        |       |       |        |
| <b>SMARCA2</b>                             | 5DKH | -6.87  | -7.33  | -8.05        | -5.72  | -6.20 | -6.64 | -8.36  |
| Transmembrane 1-electron transfer carriers |      |        |        |              |        |       |       |        |
| <b>UQCRB</b>                               | 5NMI | -7.20  | -7.54  | -8.36        | -7.59  | -7.08 | -7.18 | -7.60  |
| Other cytosolic                            |      |        |        |              |        |       |       |        |
| <b>MCL1</b>                                | 5FDR | -7.96  | -6.75  | -8.77        | -8.10  | -7.05 | -7.31 | -10.38 |
| SuperPred 3.0                              |      |        |        |              |        |       |       |        |
| <b>APE1</b>                                | 6BOW | -4.22  | -4.34  | -4.21        | -4.59  | -4.10 | -3.47 | -5.98  |
| <b>BCHE</b>                                | 5LKR | -8.78  | -8.84  | <b>-9.97</b> | -8.62  | -7.44 | -8.45 | -7.27  |
| <b>C5AR</b>                                | 6C1R | -5.12  | -5.62  | -7.26        | -5.66  | -5.34 | -5.72 | -10.29 |
| <b>CAPN1</b>                               | 1ZCM | -5.92  | -6.34  | <b>-7.54</b> | -6.86  | -5.69 | -6.14 | -5.20  |
| <b>CHRM4</b>                               | 5DSG | -10.48 | -10.71 | -10.50       | -10.38 | -9.55 | -9.27 | -11.09 |
| <b>CHRM5</b>                               | 6OL9 | -10.05 | -10.22 | -10.18       | -10.05 | -8.83 | -9.40 | -10.6  |
| <b>CHRNA4</b>                              | 6UR8 | -5.34  | -5.70  | -6.75        | -6.10  | -5.41 | -6.17 | -5.86  |
| <b>CK</b>                                  | 6TLS | -7.58  | -7.65  | <b>-8.84</b> | -7.71  | -7.21 | -7.65 | -6.28  |
| <b>CLK4</b>                                | 6FYV | -7.57  | -7.69  | -8.89        | -8.12  | -7.12 | -7.65 | -9.97  |
| <b>COX2</b>                                | 5F19 | -6.80  | -6.76  | -7.78        | -6.67  | -5.94 | -6.75 | N/D    |
| <b>CPAR</b>                                | 6C1R | -5.12  | -5.62  | -7.26        | -5.66  | -5.34 | -5.72 | -10.29 |
| <b>CPSD</b>                                | 4OD9 | -7.26  | -7.64  | -8.65        | -7.56  | -6.66 | -7.39 | -9.94  |

|               |      |       |       |              |       |       |       |        |
|---------------|------|-------|-------|--------------|-------|-------|-------|--------|
| <b>CYP3A4</b> | 5VCC | -5.88 | -6.41 | -6.87        | -6.20 | -5.71 | -7.07 | -21.45 |
| <b>DUSP3</b>  | 3F81 | -5.27 | -5.55 | -6.17        | -5.95 | -4.61 | -5.66 | -7.69  |
| <b>FPR2</b>   | 6OMM | -5.95 | -5.51 | -5.93        | -5.51 | -4.33 | -5.37 | -7.20  |
| <b>GLUT1</b>  | 6THA | -6.15 | -6.77 | <b>-7.99</b> | -6.74 | -6.44 | -6.92 | -1.38  |
| <b>GNAI1</b>  | 6N4B | -7.76 | -8.31 | <b>-9.77</b> | -8.28 | -7.37 | -7.88 | -9.25  |
| <b>HADH2</b>  | 2O23 | -7.04 | -7.96 | -8.58        | -7.38 | -7.59 | -6.84 | -13.21 |
| <b>HERG</b>   | 5VA1 | -3.19 | -3.17 | -3.54        | -3.72 | -2.87 | -3.11 | -5.06  |
| <b>MDM4</b>   | 6Q9Y | -5.81 | -5.89 | -7.29        | -6.13 | -5.39 | -5.86 | -8.32  |
| <b>NFKB1</b>  | 1SVC | -4.73 | -4.93 | <b>-5.79</b> | -5.08 | -3.92 | -4.89 | -2.29  |
| <b>NR1A1</b>  | 3ILZ | -8.55 | -7.62 | -10.92       | -9.97 | -8.81 | -8.96 | -12.91 |
| <b>NR1I2</b>  | 6TFI | -8.82 | -8.91 | -10.19       | -9.15 | -8.06 | -8.89 | -11.21 |
| <b>PRCP</b>   | 3N2Z | -7.25 | -6.92 | -6.63        | -7.48 | -4.82 | -5.32 | -6.51  |
| <b>PSMA2</b>  | 6KWY | -3.38 | -3.42 | -3.90        | -4.30 | -3.05 | -4.14 | -22.93 |
| <b>SLC1A3</b> | 5LM4 | -5.53 | -5.49 | -6.76        | -6.10 | -4.65 | -5.39 | -9.61  |
| <b>TDP1</b>   | 6N0D | -5.82 | -5.54 | -6.42        | -5.61 | -4.64 | -4.73 | -7.67  |
| <b>TRIM24</b> | 4YBM | -6.14 | -6.08 | <b>-7.13</b> | -6.27 | -5.56 | -6.57 | -5.98  |
